# Supplementary material for: Quantum dot display enhances activity of a phosphotriesterase trimer
Source: Royal Society of Chemistry journal article supplement (doi:10.1039/c5cc00418g), 2015-01-01
Supplement: c5cc00418g1.pdf [file c5cc00418g1.pdf]

## Supplementary Information

### Quantum dot display enhances activity of a phosphotriesterase trimer

Joyce C. Breger, Scott A. Walper, Eunkeu Oh, Kimihiro Susumu, Michael H. Stewart,

Jeffrey R Deschamps and Igor L. Medintz

**Supplementary Scheme 1.** Structure of the DHLA-CL4 ligand used to solubilize the QDs:

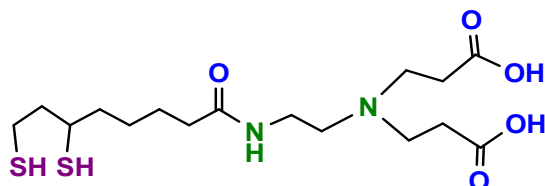

**Supplementary Scheme 2.** PTE<sub>3</sub>-paraoxon (parathion) reaction:

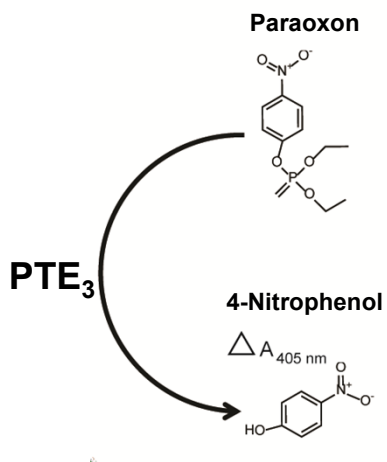

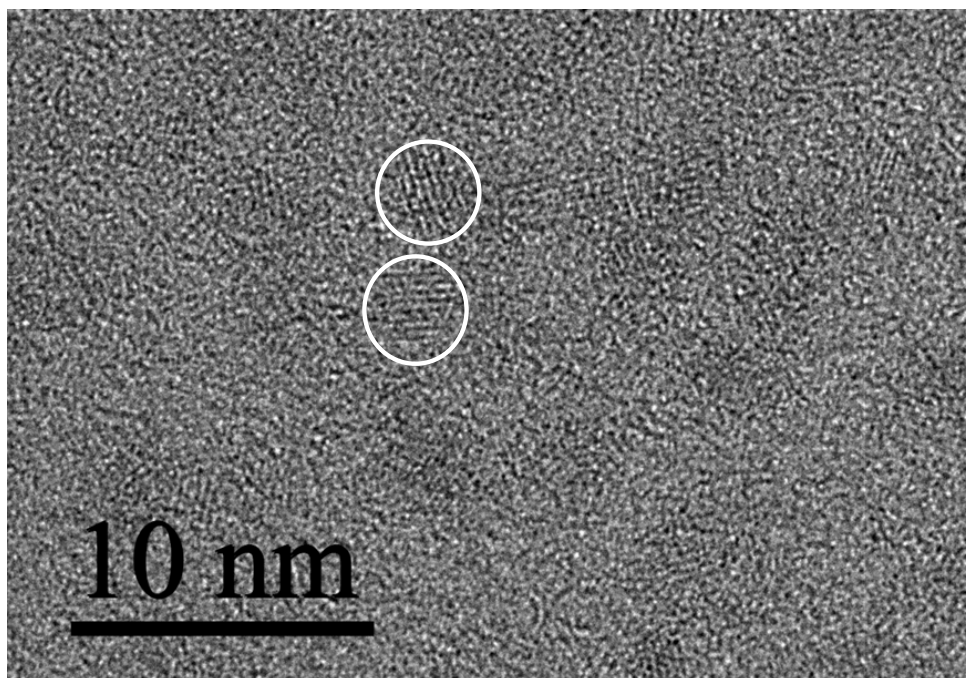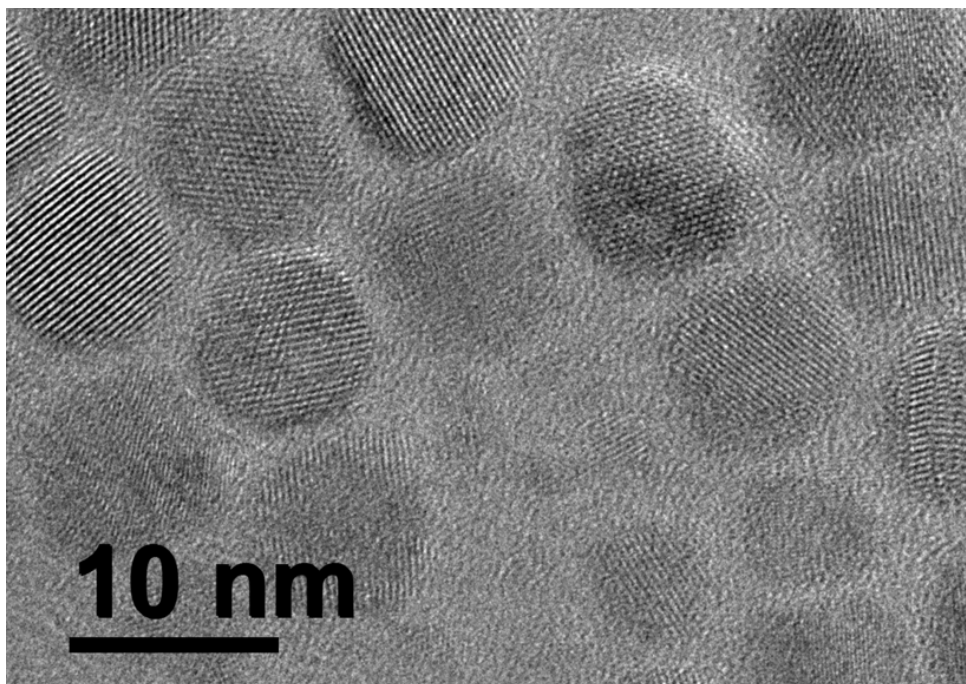

**Supplementary Figure 1.** Representative TEM micrographs of the 525 nm emitting (Top, diameter  $4.3 \pm 0.5$ ) and 625 nm emitting QDs (Bottom, diameter  $9.2 \pm 0.8$ ) utilized in this study.

**PTE<sub>3</sub> protein design and expression.** The phosphotriesterase (PTE) gene from *Brevundimonas diminuta* [1] and the collagen-like triple helix domain from *Streptococcus pyogenes* [2,3] were synthesized by Genscript with flanking *NcoI* and *XhoI* sites to facilitate cloning into the bacterial expression vector pET28 (Novagen). The sequence of the expression construct was confirmed prior to transformation of the *Escherichia coli* expression strain BL21 (DE3) (New England Biolabs).

Expression of the PTE triple helix construct was conducted in shake flask cultures. Briefly, 500 ml of Terrific Broth (Fisher Scientific) was inoculated with 5 ml of an overnight culture and incubated for 3-4 hours at 37°C until mid-log stage as determined by optical density at 600 nm ( $OD_{600} = 0.6 - 1.0$ ). The temperature was then adjusted to 30°C and expression induced with isopropyl- $\beta$ -D-pyranogalactoside (IPTG) at a final concentration of 0.25 mM. Expression continued overnight (~20 hours). Cells were pelleted via centrifugation (wet weight 6 – 8g) then stored for a minimum of 3 hours at -80°C to facilitate cell lysis.

Cell pellets were resuspended in 30 ml of ice cold lysis buffer (1/2 x phosphate buffered saline (PBS), 1 mM ethylenediaminetetraacetic acid (EDTA), 0.01% Triton X-100, 1 mg/ml lysozyme) and mixed to homogeneity. The cell suspension was sonicated using a Branson sonifier (output 7 at a constant duty cycle) three times at one minute intervals to ensure cell lysis and shearing of chromosomal DNA. The lysate was centrifuged for 30 min at 8,000 x g to pellet cellular debris and insoluble material. The soluble fraction was decanted to a 50 ml conical tube and batched with a 500  $\mu$ l bed volume of Ni-NTA resin (GE Healthcare) for 3 hours at 4°C with constant rotation on a Dynal rotisserie. The Ni-NTA resin was batch washed three times with a 60x bed volume of wash buffer (20 mM phosphate (pH 6.5), 400 mM NaCl, 0.05% Tween-20, 25 mM imidazole). The resin was then transferred to a chromatography column and the PTE triple helix protein eluted with wash buffer containing 300 mM imidazole. Protein concentration of individual fractions was approximated based on optical density at 280 nm measured using a NanoDrop 1000 instrument (Fisher Scientific). Protein containing fractions were pooled and stored at 4°C for 48 hours to allow the tertiary structure to form. The triple helix complex was then separated from monomer and dimer forms of the protein via size exclusion chromatography on an ENrich EC650 column and DuoFlow system (both from Bio-Rad Laboratories).

As with overexpression of the standard PTE enzyme, the triple helix construct was somewhat toxic to the cell culture. The optimized expression protocol yielded 8 – 10 mg of protein per liter of cell culture (12 – 16 g of wet cell pellet). Additionally, initial expression/purification efforts did not account for the slow formation of the triple helix and samples were immediately subjected to FPLC following IMAC purification. In these instances, the monomer fraction was the predominant product. The 48 hour incubation was determined empirically which led to the triple helix being the primary product following FPLC.

**Protein and nucleotide sequences:**

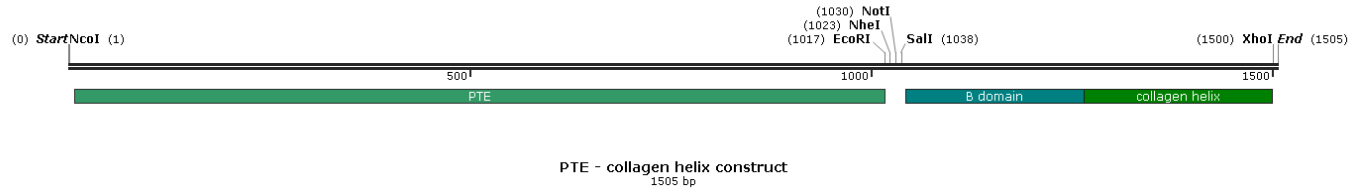

**Cloning sites**

PTE

V-domain

Collagen repeats

**Amino acid sequence of construct:**

**MG**SIGTGDRINTVRGPITISEAGFTLTHEHICGSSAGFLRAWPEFFGSRKALAEKAVRGLRRARAAGVRTIVDVSTFDIGR  
 DVSLLAEVSRAADVHIVAATGLWFDPLSMRLRSVEELTQFFLREIQYGIEDTGIRAGIIKVATTGKATPFQELVLKAAAR  
 ASLATGVPVTTHTAASQRDGEQQAIFESEGLSPSRVCIGHSDTDDLSYLTALAARGYLIGLDHIPHSAIGLEDNASASA  
 LLGIRSWQTRALLIKALIDQGYMKQILVSNDFLFGFSSYVTNIMDVMDRVNPDGMAFIPLRVIPFLREKGVQPQETLAGIT  
 VTNPARFLSPTLRAS**EFASAAAVD**ADEQEEKAKVRTELIQELAQGLGGIEKKNFPTLGDEDLDHTYMTKLLTYLQEREQA  
 ENSWRKRLKGIQDHALD**GPRGEQGPQGLPGKDGEAGAQPAGPMPAGERGERGEKGEPTQGAKGDRGETGPVGP**  
 RGERGEAGPAGKDGGERGPVGP**A** **LE**

**Nucleotide sequence of construct:**

ccatgggcAGCATTGGCACCGGCGATCGCATTAAACACCGTGC GCGGCCCGATTACCATTAGCGAAGCGGGCTTTACC  
 CTGACCCATGAACATATTTGCGGCAGCAGCGCGGGCTTTCTGCGCGCGTGGCCGGAATTTTTTGGCAGCCGCAAAGC  
 GCTGGCGGAAAAAGCGGTGCGCGGCCCTGCGCCGCGCGCGCGCGGGCGGGCGTGC GCACCATTTGTGGATGTGAGCACCT  
 TTGATATTGGCCGCGATGTGAGCCTGCTGGCGGAAGTGAGCCGCGCGGGCGGATGTGCATATTGTGGCGGCGACCGGC  
 CTGTGGTTTGATCCGCCGCTGAGCATGCGCCTGCGCAGCGTGGAAGAACTGACCCAGTTTTTTCTGCGCGAAATTCA  
 GTATGGCATTGAAGATAACCGCATTTCGCGCGGGCATTATTAAGTGCGACCACCGGCAAAGCGACCCCGTTTCAGG  
 AACTGGTGCTGAAAGCGGCGCGCGAGCCTGGCGACCGCGTGCCGGTGACCACCCATACCGCGGCGAGCCAG  
 CGCGATGGCGAACAGCAGGCGGCGATTTTTGAAAGCGAAGGCCTGAGCCCAGCCGCGTGTGCATTGGCCATAGCGA  
 TGATACCGATGATCTGAGCTATCTGACCGCGCTGGCGGCGCGCGCTATCTGATTGGCCTGGATCATATTCCGCATA  
 GCGCGATTGGCCTGGAAGATAACGCGAGCGCGAGCGCGCTGCTGGGCATTTCGCAGCTGGCAGACCCGCGCGCTGCTG  
 ATTAAGCGCTGATTGATCAGGGCTATATGAAACAGATTCTGGTGAGCAACGATTGGCTGTTTGGCTTTAGCAGCTA  
 TGTGACCAACATTATGGATGTGATGGATCGCGTGAACCCGGATGGCATGGCGTTTTATTCCGCTGCGCGTATTCCGT  
 TTCTGCGCGAAAAAGGCGTGCCGCAGGAAACCCTGGCGGGCATTACCGTGACCAACCCGCGCGCTTTCTGAGCCCG  
 ACCCTGCGCGGAGCgaattcgctagcgcggccgcgggtcgac**GCGGACGAACAGGAAGAAAAAGCGAAAGTTCGTAC**  
 CGAACTGATCCAGGAACTGGCGCAGGGTCTGGGTGGTATCGAAAAAAAACCTCCCGACCCTGGGTGACGAAGACC  
 TGGACCACACCTACATGACCAAACCTGCTGACCTACCTGCAGGAACGTGAACAGGCGGAAAACTCTTGGCGTAAACGT  
 CTGCTGAAAGGTATCCAGGACCACGCGCTGGACGGTCCGCGTGGTGAACAGGGTCCGCAGGGTCTGCCGGGTAAAGA  
 CGGTGAAGCGGGTGCAGGGTCCGGCGGGTCCGATGGGTCCGGCGGGTGAACGTGGTGA AAAAGGTGAACCGGGTA  
 CCCAGGGTGC GAAAGGTGACCGTGGTGAACCGGTCCGGTTGGTCCGCGTGGTGAACGTGGTGAAGCGGGTCCGGCG  
 GGTAAAGACGGTGAACGTGGTCCGGTTGGTCCGGCGctcgag

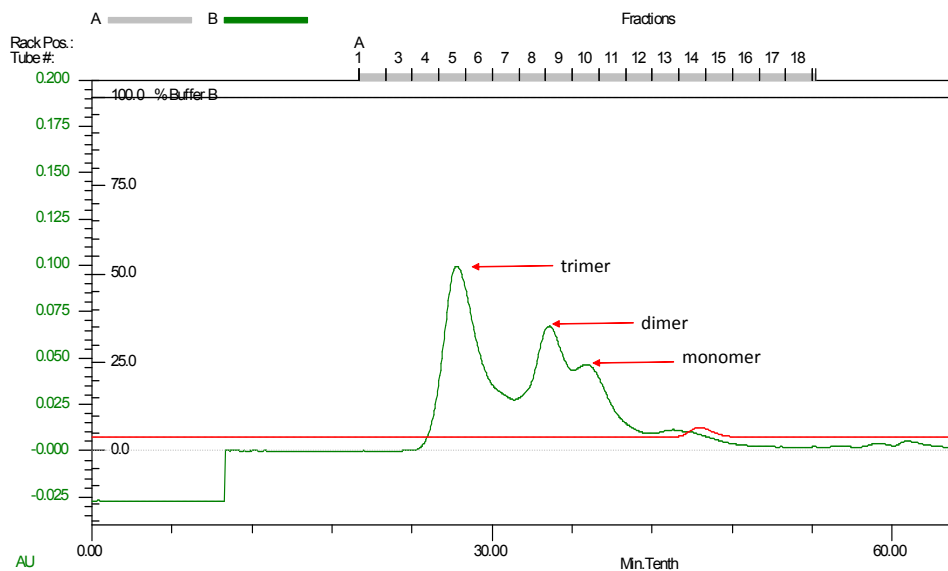

Supplementary Figure 1. Representative FPLC chromatogram showing the presence of PTE3 trimer, dimer and monomers during purification.

**Dynamic Light Scattering and Zeta-Potential.** Dynamic light scattering (DLS) measurements were carried out using a CGS-3 goniometer system equipped with a HeNe laser illumination at 633 nm and a single-photon counting avalanche photodiode for signal detection (ALV, Langen, Germany). The autocorrelation function was performed by an ALV-5000/EPP photon correlator (ALV, Langen, Germany) and analyzed using Dispersion Technology Software (DTS, Malvern Instruments Ltd, Worcestershire, UK). QDs (625 nm; 20-50 nM in 0.1×PBS buffer, 525 nm; 50-100 nM in 0.1×PBS buffer, pH 7.4) and enzyme (1.5-3.0  $\mu\text{M}$ ) were prefiltered through 0.25  $\mu\text{m}$  syringe filters prior to DLS measurements to remove dust or impurities in the sample. To measure the effect of enzyme conjugation on the hydrodynamic size of NPs, we used the prefiltered QD solution mixed with the desired amount of enzyme (4-30 times that of QD concentration) with and without substrates ( $\sim 10 \mu\text{M}$ ). Sample temperature was maintained at 20°C. For each sample, the autocorrelation function was the average of three runs of 10 sec each and then repeated at different scattering angles (within 80° and 110°). CONTIN analysis was then used to extract number *versus* hydrodynamic size profiles for the dispersions studied. For Zeta-Potential ( $\zeta$ -potential) measurement, Laser Doppler Velocimetry (LDV) measurements were performed using a ZetaSizer NanoSeries equipped with a HeNe laser source ( $\lambda = 633 \text{ nm}$ ) (Malvern Instruments Ltd, Worcestershire, UK) and an avalanche photodiode for detection,

controlled with DTS software. Micromolar concentration solutions of QDs or QD-bioconjugates were loaded into disposable cells, and data were collected at 25°C. Three runs of the measurements were performed for each sample to achieve the zeta potential. All the samples were prepared in 0.1×PBS buffer pH 7.4 with similar concentration as DLS measurement.

**Supplementary Table 1. Hydrodynamic diameters, diffusion coefficients and  $\zeta$ -potential of select PTE<sub>3</sub>-QD conjugates**

| Sample                          | Hydrodynamic diameter<br>(nm) | Diffusion coefficient<br>( $\mu^2/s$ ) | $\zeta$ -potential<br>(mV at pH 8.5) |
|---------------------------------|-------------------------------|----------------------------------------|--------------------------------------|
| <b>525 QD only</b>              | <b>14.4 ± 0.7</b>             | <b>29.1 ± 1.4</b>                      | <b>-37.7 ± 0.7</b>                   |
| PTE <sub>3</sub> :525 QD (2:1)  | 16.7 ± 0.7                    | 25.1 ± 1.0                             | -27.8 ± 0.4                          |
| PTE <sub>3</sub> :525 QD (4:1)  | 20.4 ± 1.2                    | 20.5 ± 1.2                             | -23.9 ± 0.8                          |
| PTE <sub>3</sub> :525 QD (8:1)  | 22.2 ± 0.8                    | 18.9 ± 0.7                             | -21.3 ± 12.2                         |
| PTE <sub>3</sub> :525 QD (16:1) | 32.8 ± 1.2                    | 12.8 ± 0.5                             | -19.4 ± 0.9                          |
| <b>625 QD only</b>              | <b>16.8 ± 0.1</b>             | <b>24.9 ± 0.2</b>                      | <b>-33.1 ± 1.3</b>                   |
| PTE <sub>3</sub> :625 QD (2:1)  | 18.4 ± 1.2                    | 22.8 ± 1.4                             | -26.6 ± 1.3                          |
| PTE <sub>3</sub> :625 QD (4:1)  | 18.4 ± 1.1                    | 22.8 ± 1.4                             | -20.5 ± 0.5                          |
| PTE <sub>3</sub> :625 QD (8:1)  | 24.6 ± 2.6                    | 17.0 ± 1.8                             | -19.6 ± 0.4                          |
| PTE <sub>3</sub> :625 QD (16:1) | 34.4 ± 1.6                    | 12.2 ± 0.6                             | -17.9 ± 1.4                          |
| PTE <sub>3</sub> :625 QD (32:1) | 39.3 ± 0.7                    | 10.6 ± 0.2                             | -16.2 ± 1.2                          |
| <b>PTE<sub>3</sub></b>          | <b>10.1 ± 0.7</b>             | <b>41.3 ± 2.7</b>                      | <b>-9.8 ± 1.7</b>                    |

Standard deviation was calculated from repeated measurements (n = 3-5).  $H_D$  was obtained from Dynamic Light Scattering (DLS) experiments and  $\zeta$ -potential was obtained from Laser Doppler Velocimetry (LDV) measurements. 525 QD diameter 4.3 ± 0.5 nm/625 QD diameter 9.2 ± 0.8 nm.

**PTE<sub>3</sub> Structural Simulation.** Models were constructed using coordinates available in the PDB and short peptides constructed using tools in Chimera 1.7 [4]. For domains with no published structure (*i.e.* the V-domain) a search was conducted on the PDB using the FASTA algorithm to identify structures with similar sequences. Domains that were constructed or modified were energy minimized in Chimera using built in features including ANTECHAMBER (version 1.27) and the AM1-BCC method of calculating charges [5].

The simulated protein complex consists of four domains: a phosphotriesterase domain (PDB entry 1PSC [6]), a peptide linker (constructed as an extended peptide using tools in Chimera 1.7), the V-domain (modeled starting from PDB entry 4NSM selected based on sequence homology with the target sequence [7]), the collagen domain (constructed from PRB entry 1K6F [8]), and a poly-histidine tail. After assembling the phosphotriesterase-linker-D-domain onto one of the collagen chains, it was noted that the two alpha-helices of the V-domain could be re-oriented to lay along the collagen helix. Since the V-domain is required for proper assembly of the collagen triple helix, torsion angles in the region where the V-domain is joined to the collagen were adjusted to create this orientation. While there is no direct evidence to support this arrangement, the fact that the V-domain is required for proper folding of the collagen helix supports some kind of interaction between these two domains.

## References:

- 1) Dumas DP, Caldwell SR, Wild JR, Raushel FM. Purification and properties of the phosphotriesterase from *Pseudomonas diminuta*. *The Journal of Biological Chemistry*. 1989;264:19659-65.
- 2) Yoshizumi A, Fletcher JM, Yu Z, Persikov AV, Bartlett GJ, Boyle AL, et al. Designed Coiled Coils Promote Folding of a Recombinant Bacterial Collagen. *Journal of Biological Chemistry*. 2011;286:17512-20.
- 3) Mohs A, Silva T, Yoshida T, Amin R, Lukomski S, Inouye M, et al. Mechanism of Stabilization of a Bacterial Collagen Triple Helix in the Absence of Hydroxyproline. *Journal of Biological Chemistry*. 2007;282:29757-65
- 4) Pettersen, E.F., Goddard, T.D., Huang, C.C., Couch, G.S., Greenblatt, D.M., Meng, E.C., Ferrin, T.E., UCSF Chimera – A Visualization System for Exploratory Research and Analysis, *J. Comput. Chem.*, **25**(13), 1605-1612 (2004).
- 5) Wang, J., Wang, W., Kollman, P.A., Case, D.A., Automatic atom type and bond type perception in molecular mechanical calculations. *J. Mol. Graphics*, **25**(2), 247-260 (2006).
- 6) Benning, M.M., Kuo, J.M., Raushel, F.M., Holden, H.M. Three-dimensional structure of the binuclear metal center of phosphotriesterase. *Biochemistry*, **34**(25), 7973–7978 (1995).
- 7) queglia, F., Bachert, B., De Simone, A., Lukomski, S., Berisio, R., The crystal structure of the streptococcal collagen-like protein 2 globular domain from invasive M3-type group A Streptococcus shows significant similarity to immunomodulatory HIV protein gp41. *J. Biol. Chem.*, **289**(8), 5122-5133 (2014).
- 8) Berisio, R., Vitagliano, L., Lelio Mazzarella, L., Zagari, A. Crystal structure of the collagen triple helix model [(Pro-Pro-Gly)(10)](3). *Protein Sci.*, **11**(2), 262–270 (2002).
